# Supplementary material for: Reconstructing cancer genomes from paired-end sequencing data
Source: PubMed Central journal article supplement (PMC3358655; doi:10.1186/1471-2105-13-s6-s10), 2012-04-19
Supplement: 1471-2105-13-S6-S10-S1.pdf [file 1471-2105-13-S6-S10-S1.pdf]

# Supplemental Figures for Reconstructing Cancer Genomes from Paired-end Sequencing Data

Layla Oesper\*

layla@cs.brown.edu

Anna Ritz\*

aritz@cs.brown.edu

Sarah J. Aerni<sup>†</sup>

saerni@stanford.edu

Ryan Drebin\*

ryan\_drebin@brown.edu

Benjamin J. Raphael<sup>\*,‡</sup>

braphael@cs.brown.edu

---

\*Department of Computer Science, Brown University, Providence, RI.

<sup>†</sup>BioMedical Informatics Program, Stanford University, Stanford, CA.

<sup>‡</sup>Center for Computational Molecular Biology, Brown University, Providence, RI.

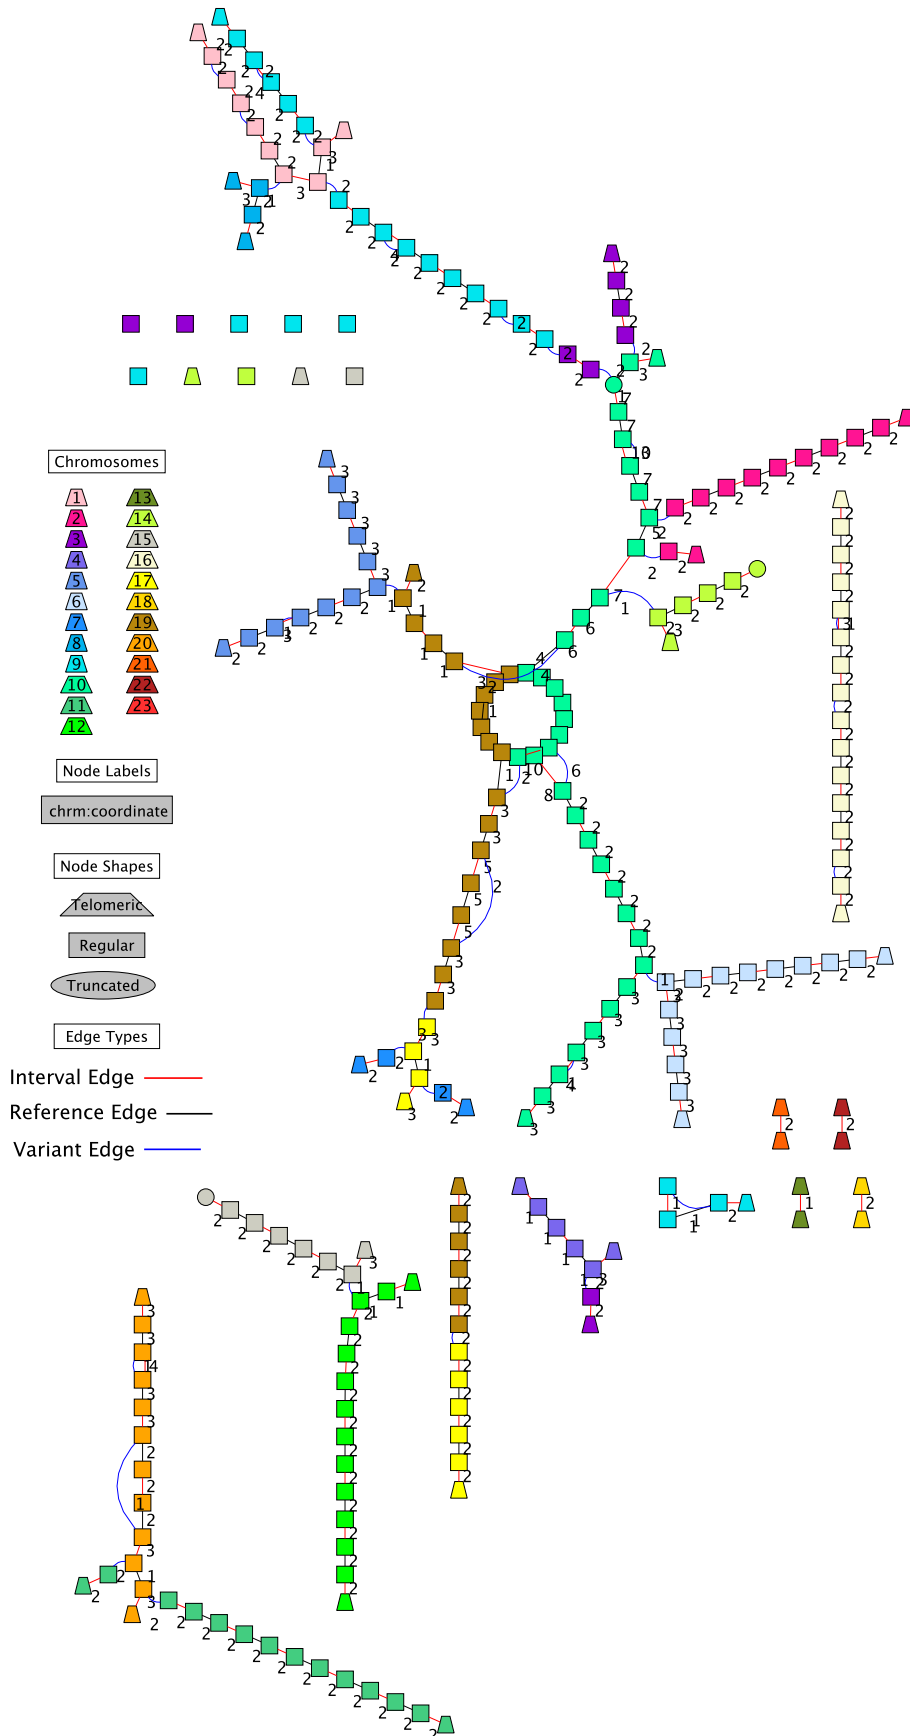

**Figure 1:** Cancer Genome Reconstruction for OV1 when a minimum of 10 discordant pairs are required to add a variant edge to the graph.

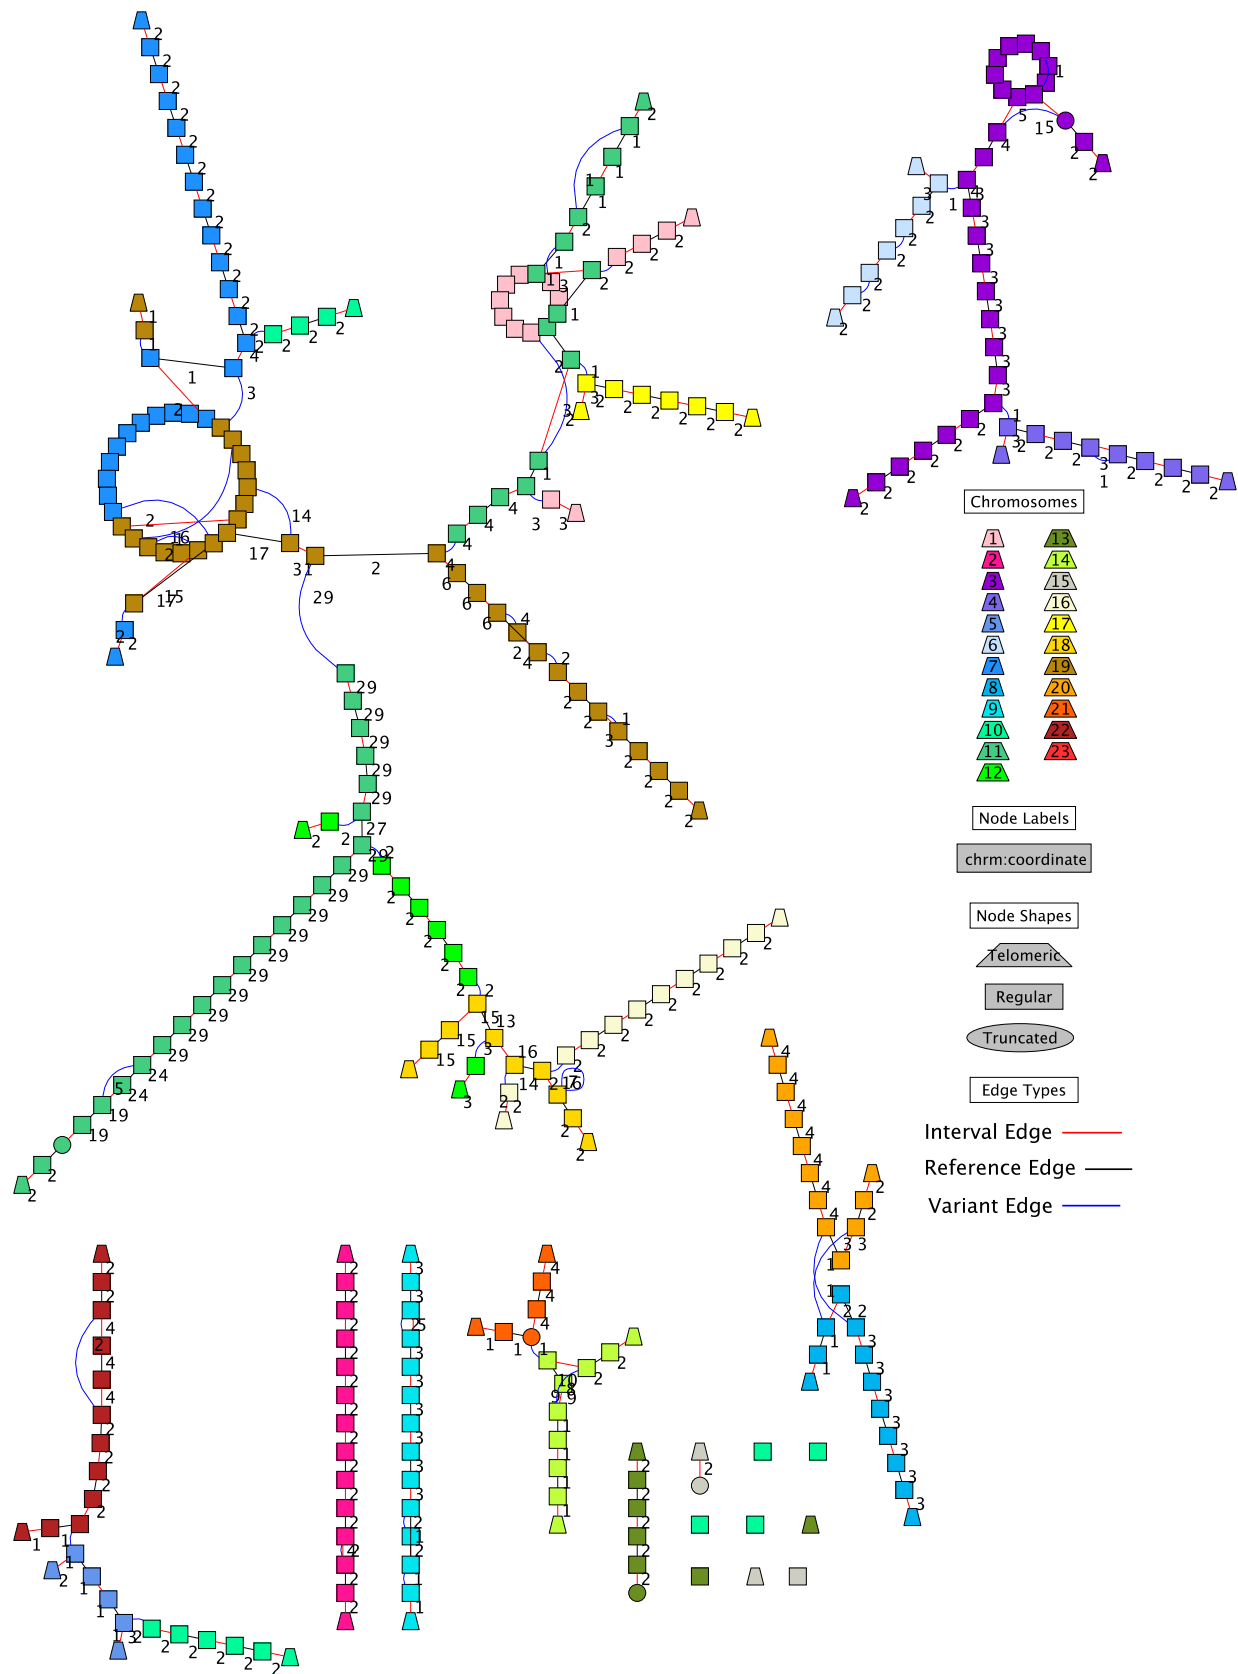

**Figure 2:** Cancer Genome Reconstruction for OV2 when a minimum of 10 discordant pairs are required to add a variant edge to the graph.

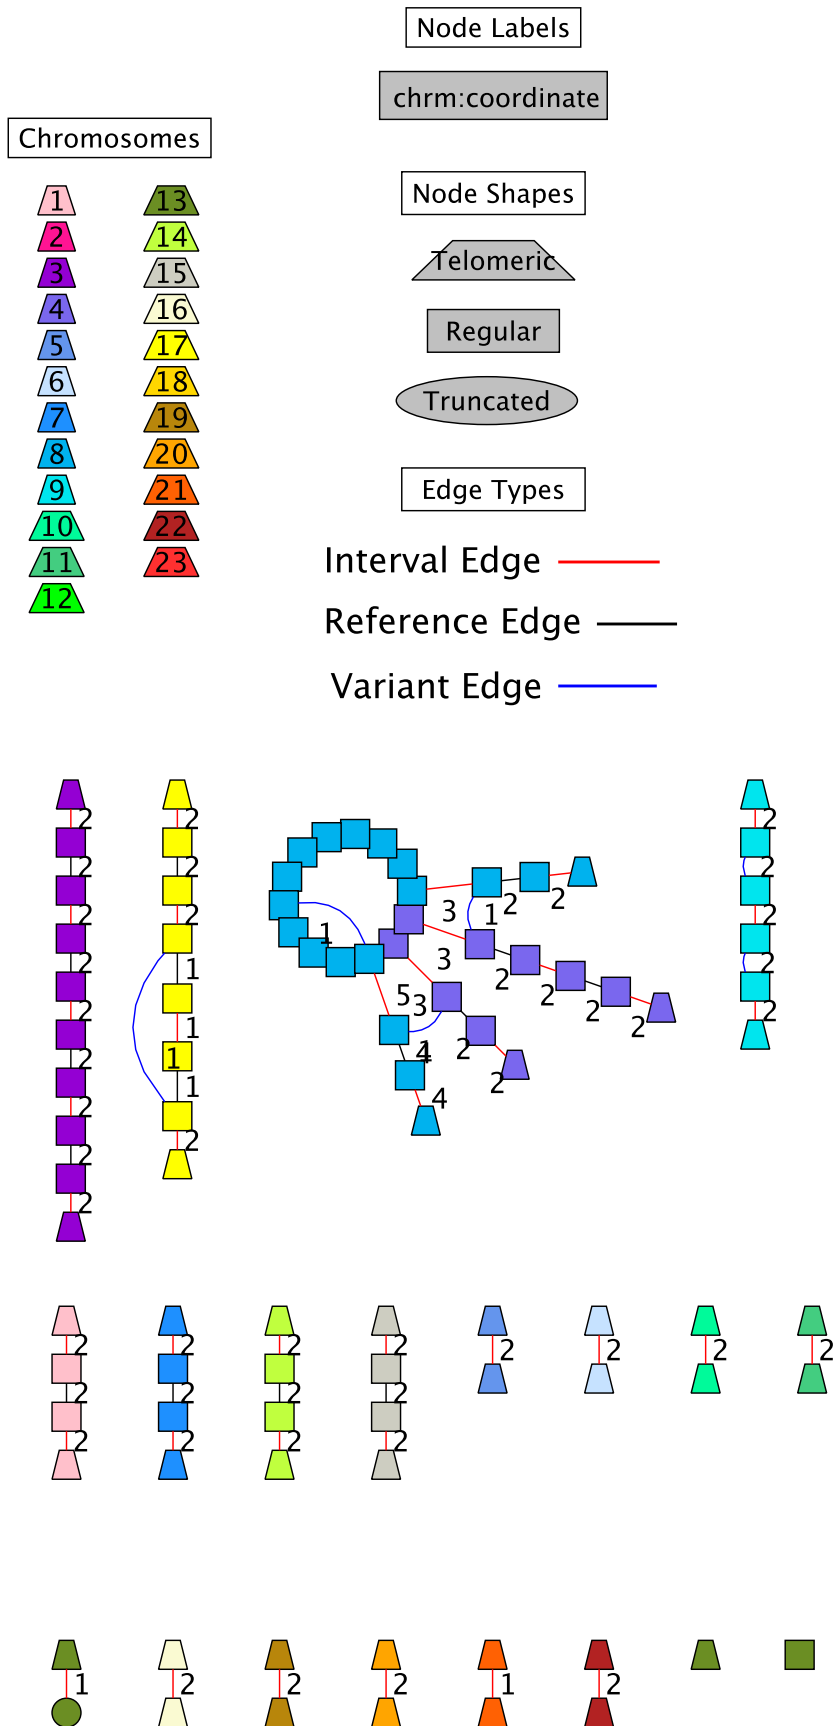

**Figure 3:** Cancer Genome Reconstruction for OV3 when a minimum of 10 discordant pairs are required to add a variant edge to the graph.

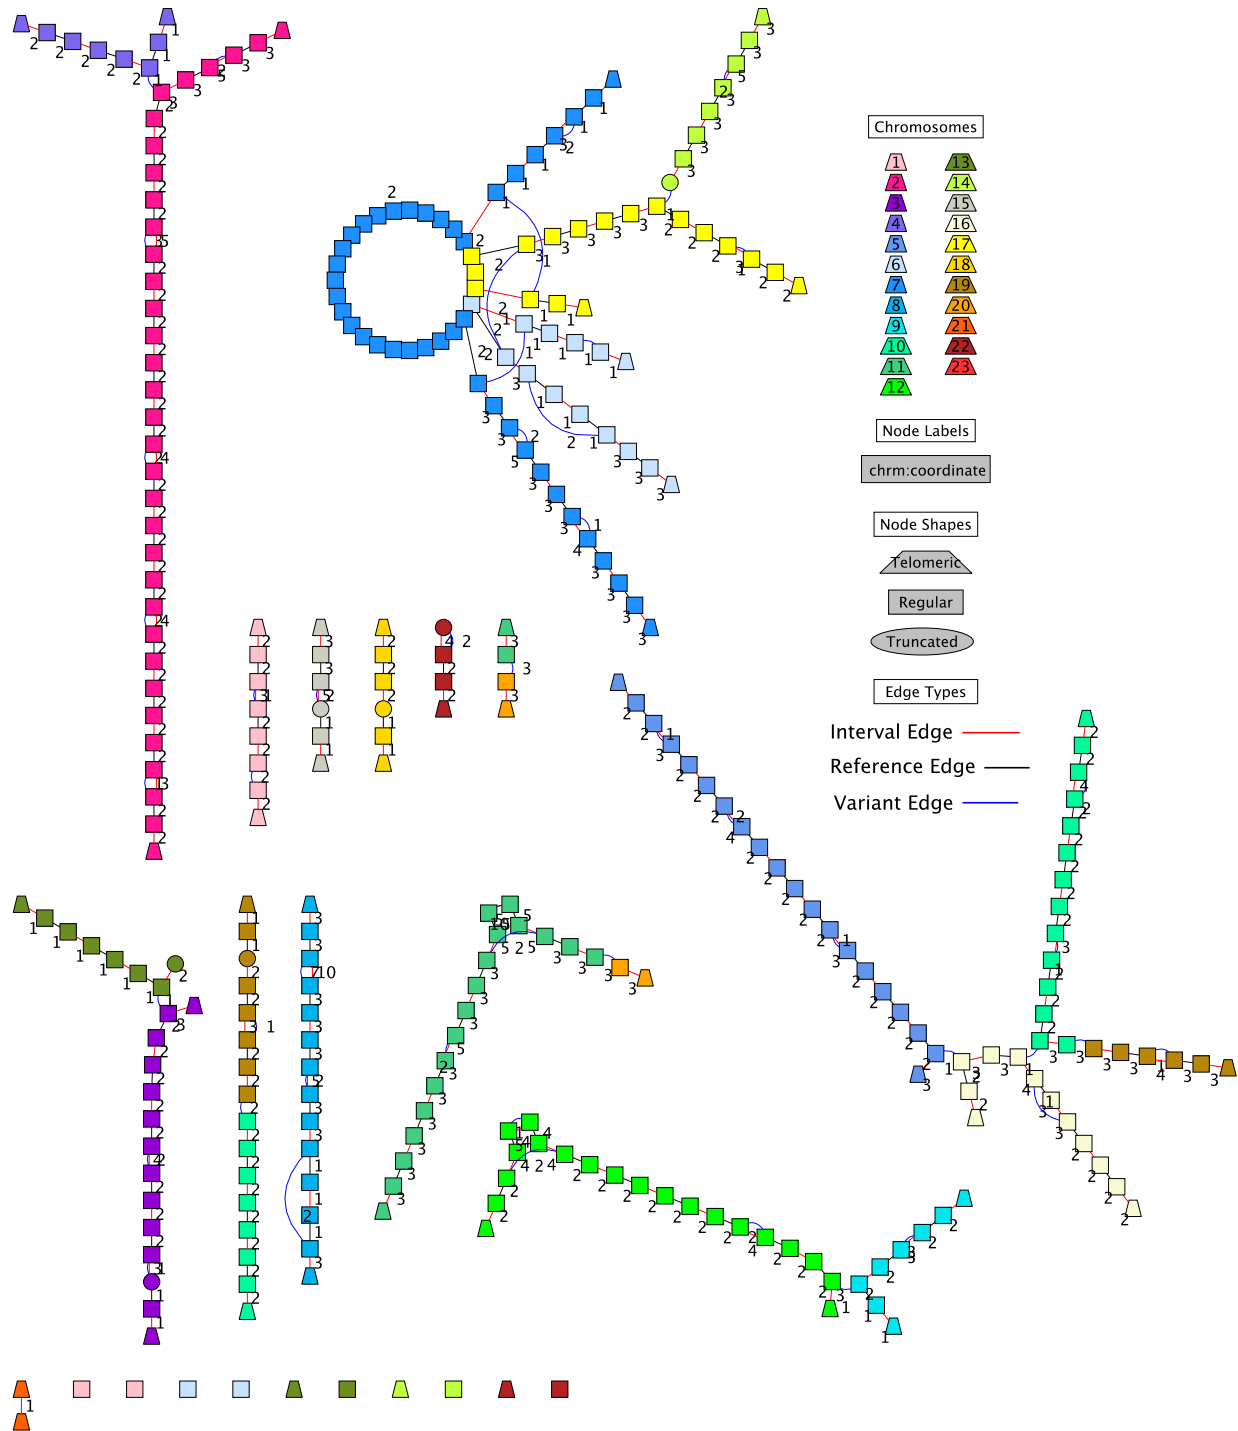

**Figure 4:** Cancer Genome Reconstruction for OV4 when a minimum of 10 discordant pairs are required to add a variant edge to the graph.

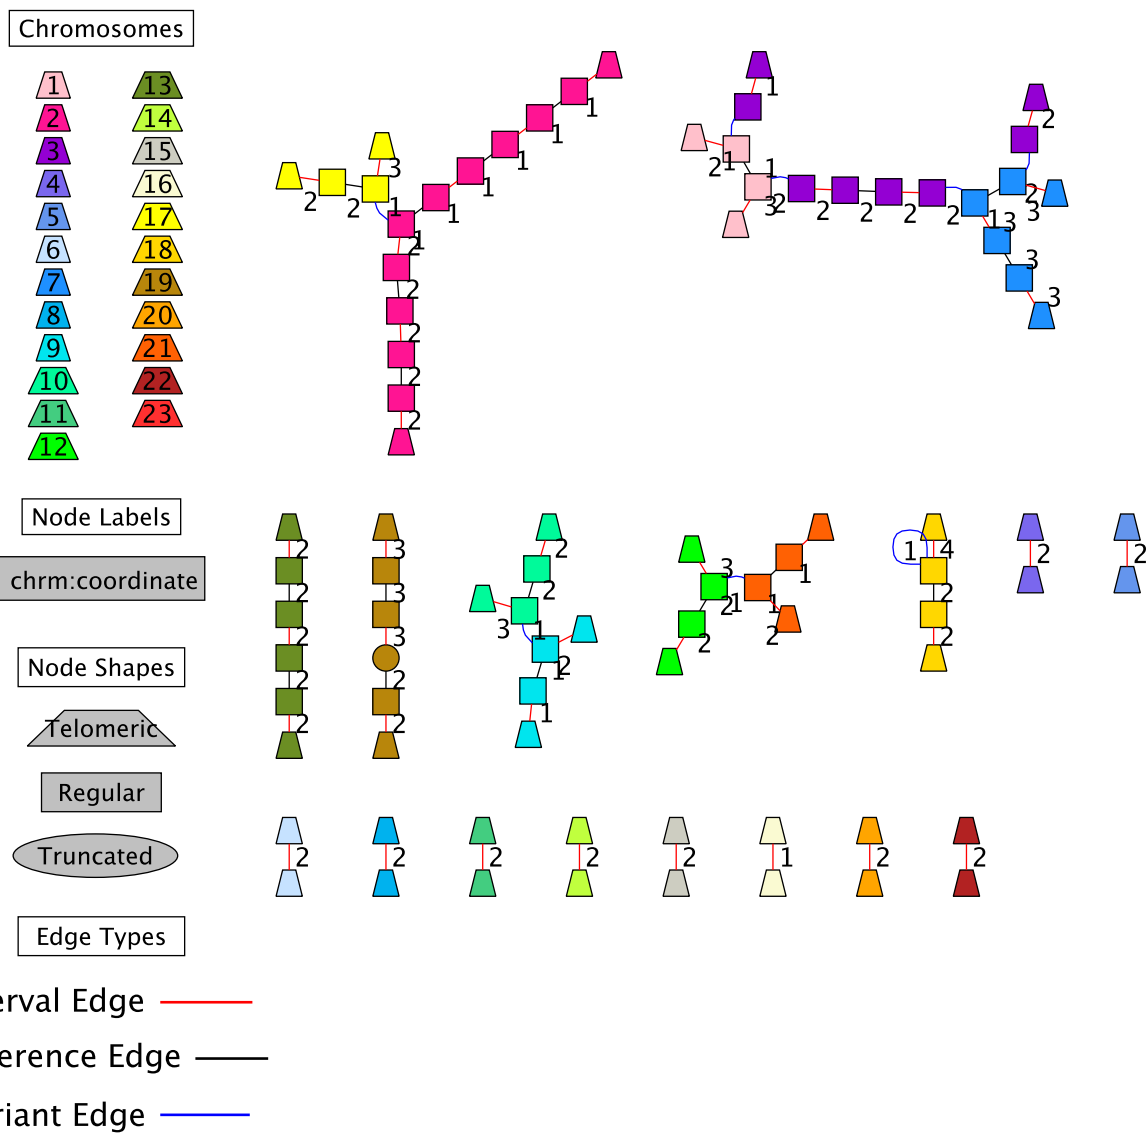

**Figure 5:** Cancer Genome Reconstruction for OV5 when a minimum of 10 discordant pairs are required to add a variant edge to the graph.
